# Supplementary material
Source: PubMed Central journal article supplement (PMC5883622)
Supplement: mmc3.pdf [file mmc3.pdf]

# Mechanosensitivity of Cancer Cells in Contact with Soft Substrates Using AFM

Yara Abidine,<sup>1</sup> Andrei Constantinescu,<sup>2</sup> Valérie M. Laurent,<sup>1</sup> Vinoth Sundar Rajan,<sup>3</sup> Richard Michel,<sup>1</sup> Valentin Laplaud,<sup>1</sup> Alain Duperray,<sup>3</sup> and Claude Verdier<sup>1,\*</sup>

<sup>1</sup>University Grenoble Alpes, CNRS, LIPhy, Grenoble, France; <sup>2</sup>Laboratoire de Mécanique des Solides, École Polytechnique, CNRS, Palaiseau, France; and <sup>3</sup>Institute for Advanced Biosciences, INSERM U 1209, CNRS UMR 5309, University Grenoble Alpes, Grenoble, France

**ABSTRACT** Cancer cells are usually found to be softer than normal cells, but their stiffness changes when they are in contact with different environments because of mechanosensitivity. For example, they adhere to a given substrate by tuning their cytoskeleton, thus affecting their rheological properties. This mechanism could become efficient when cancer cells invade the surrounding tissues, and they have to remodel their cytoskeleton in order to achieve particular deformations. Here we use an atomic force microscope in force modulation mode to study how local rheological properties of cancer cells are affected by a change of the environment. Cancer cells were plated on functionalized polyacrylamide substrates of different stiffnesses as well as on an endothelium substrate. A new correction of the Hertz model was developed because measurements require one to account for the precise properties of the thin, layered viscoelastic substrates. The main results show the influence of local cell rheology (the nucleus, perinuclear region, and edge locations) and the role of invasiveness. A general mechanosensitive trend is found by which the cell elastic modulus and transition frequency increase with substrate elasticity, but this tendency breaks down with a real endothelium substrate. These effects are investigated further during cell transmigration, when the actin cytoskeleton undergoes a rapid reorganization process necessary to push through the endothelial gap, in agreement with the local viscoelastic changes measured by atomic force microscopy. Taken together, these results introduce a paradigm for a new—to our knowledge—possible extravasation mechanism.

## INTRODUCTION

The role of cell mechanics has been investigated a lot in recent years, and it is essential in many biological phenomena based on the cell's ability to modify its shape and cytoskeleton and therefore its rheology. These changes are important during embryogenesis, cell division, cell migration, metastasis, or the epithelial-mesenchymal transition, to mention just a few processes. Therefore the investigation of cell mechanics has become a major issue and has led to the development of specific tools to study cell (visco)elasticity—such as optical tweezers, optical stretchers, microplates, micropipettes, magnetic twisting cytometry, atomic force microscopy (AFM), and microbead tracking with a laser or light—to investigate cell internal microrheological properties (1).

Because of the variety of possible ways to investigate cell mechanics, different cell types have been tested; in particular, metastatic cancer cells have been studied extensively (2) and seem to become softer as they pass from blood through

the endothelium (3) to invade new tissues (4). More precisely,  $E$ , the elastic Young modulus of cells, seems to decrease when cells become invasive as compared to normal ones (5–7). This concept is not always recognized because cells may require more stiffness to break through a biological tissue, as shown recently by combining AFM and confocal microscopy (8). One way to answer this question is to study the cytoskeleton, a complex dynamic system involving actomyosin contractile elements, intermediate filaments, and microtubules (9–11). The cytoskeleton is both locally and mechanically heterogeneous (12). In particular, the region on top of the nucleus of adherent cells, or the perinuclear part, can exhibit significantly different mechanical properties as compared to protrusions or filopodia (13,14). Finally, the nucleus plays a role in cell elasticity (15), as its deformability is a prerequisite to squeeze through complex confined networks (16). Another important parameter is viscosity, which can be quite relevant (17) because of the viscous components of the cell cytoplasm and could be a potential marker of cancer cells (18).

Recently, studies focusing on the environment revealed important strategies used by cells to remodel their cytoskeleton, a process known as mechanosensing. Indeed cells can

Submitted May 23, 2017, and accepted for publication January 5, 2018.

\*Correspondence: [claude.verdier@univ-grenoble-alpes.fr](mailto:claude.verdier@univ-grenoble-alpes.fr)

Editor: Steven Rosenfeld.

<https://doi.org/10.1016/j.bpj.2018.01.005>

© 2018 Biophysical Society.

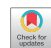

adapt their response when the substrate has changing stiffness (19) or migrate toward a more rigid substrate (20), where they spread and reinforce their focal adhesions (21). Cell spreading also increases on thinner gels, since they feel the substrate below (22). Cells also adapt their stiffness according to the substrate elasticity (23). When in contact with substrates of rapidly increasing stiffness, they develop larger forces via remodeling of the actomyosin cortex (24). Regarding the particular case of cancer cells, it has been shown that human breast cancer invasion correlates with a stiffening of the surrounding extracellular matrix (ECM) depending on cell type, matrix, integrins, or collective effects (25,26). Cancer cell invasiveness seems to be linked with the way cells sense or indent elastic gels, so it could be a good tool to distinguish them (27). Further works showed that the heterogeneity of complex Matrigels mimicking the microenvironment can promote cancer cell invasion (28). In tumors, cells remodel the ECM around them to force progression (29,30). This change in force generation has been studied using two-dimensional and three-dimensional traction force microscopy (31–33) but is not yet related so clearly to the cytoskeleton of cancer cells.

To investigate the cell microrheological properties, AFM in force modulation mode (14,17,34,35) is particularly well adapted. Despite the commonly available AFM software programs or homemade systems, few results have focused on the role of the environment on cell viscoelastic properties. Thus, in this work, we considered the effect of an elastic substrate on the mechanical properties of adhering cancer cells and evaluated their mechanosensitivity. This was carried out for three different elastic gels ( $E$  ranging from 5 to 28 kPa) and an endothelium substrate. Microrheological properties (36) were obtained in a large frequency range (1–500 Hz). Since substrates are thin and viscoelastic, a three-layer model, inspired from previous work (37), was used to account for substrate effects. Finally, using a viscoelastic model (14), two main parameters were identified that corresponded to the signature of cancer cells—namely,  $G_N^0$ , the elastic plateau modulus, and  $f_T$ , the transition frequency from an elastic to a glassy state (38). The evolution of these parameters showed surprising changes in the case of invasive cancer cells on the endothelium substrate. This was confirmed by separate transmigration experiments showing that rapid cytoskeleton reorganization is necessary to cross the endothelial barrier.

## MATERIALS AND METHODS

### Cell culture

#### Cancer cells

Three epithelial bladder cancer cell lines representing increasing malignancy states of metastasis progression were used: RT112, T24, and J82 (American Type Culture Collection, Manassas, VA). RT112 cancer cells are moderately differentiated, whereas T24 and J82 cancer cells are poorly differentiated and have a higher malignancy potential (especially J82 cells). The choice of these bladder cell lines comes from earlier studies by the authors (39–41).

Cell lines are classified according to the corresponding tumor they were taken from using the tumor node metastasis system (Union for International Cancer Control). T stands for the stage and describes how far the primary tumor has grown into the bladder ( $T_0$ – $T_4$ ). The majority of bladder cancers are linked to noninvasive papillary tumors of a lower grade ( $T_a$ ). N is the spread to lymph nodes near the bladder ( $N_0$ – $N_3$ ), and M is the spread of the tumor to other parts of the body ( $M_0$  and  $M_1$ ). This information is combined to give the overall stage ( $G_0$ – $G_4$ ). According to these standards, RT112 (luminal molecular subtype, Leibniz Institute DSMZ- German Collection of Microorganisms and Cell Cultures, Braunschweig, Germany) is a  $T_a$ – $G_2$  cell type. T24 (ATCC-HTB-4, luminal and/or basal molecular subtype) is a more invasive cell line ( $T_2$ – $G_3$ ). J82 (ATCC-HTB-1, luminal and/or basal molecular subtype) is a very invasive cell line ( $T_3$ – $G_3$ ). Taken together, this gives a wide variety of invasiveness.

These cells were cultured in RPMI 1640 (Gibco, Saint-Aubin, France) supplemented with 10% fetal calf serum and 1% penicillin-streptomycin. One day before measurements, cells were seeded at a density of  $3.0 \cdot 10^4$  cells per well on gels coated with 20  $\mu\text{g}/\text{mL}$  fibronectin (PromoCell, Heidelberg, Germany) overnight at 37°C in a humidified 5%  $\text{CO}_2$  atmosphere. Such cells are considered to have a low migrating velocity since the fibronectin concentration is quite high (42). AFM measurements were carried out on isolated cells at 37°C. Cancer cells were transfected with the LifeAct plasmid expressing actin-GFP (green fluorescent protein).

#### Endothelial cells

Human umbilical vascular endothelial cells (HUVECs) purchased from PromoCell were plated in complete culture medium (PromoCell) on glass coverslips coated with fibronectin (10  $\mu\text{g}/\text{mL}$ ) and left for 3 days at 37°C in a humidified 5%  $\text{CO}_2$  atmosphere to spread and achieve confluence.

### Cell transendothelial migration

To verify the results postulated with the atomic force microscope and understand how a change in substrate can affect the cytoskeleton of cancer cells during transmigration, an experiment was carried out using cancer cells in contact with a HUVEC monolayer that was grown on a gel with an elasticity 8 kPa. A stamping procedure was used with a patterned polydimethylsiloxane block functionalized with fibronectin (25  $\mu\text{g}/\text{mL}$ ). Stamps were put in contact with gels for 1 h and then were gently removed (43). Endothelial cells (HUVECs) were seeded in complete culture medium (PromoCell) overnight to form a monolayer on the circular 80  $\mu\text{m}$  patterns. Finally, invasive cancer cells (J82) were put in solution and left to sediment. As many patterns were used in parallel, cases with one single cancer cell adhering and transmigrating through the HUVEC monolayer could be followed. J82 cells were transfected for actin-GFP so that the actin cytoskeleton could be visualized on the confocal microscope (LSM; Carl Zeiss AG, Jena, Germany). HUVECs were stained with CellTrace Far Red DDAO-SE (Life Technologies, Carlsbad, CA) to observe their shape. The microscope was equipped with multiwave acquisition (green and red) and a chamber to maintain 37°C and supply 5%  $\text{CO}_2$  for the cells. After cancer cells had sedimented, they came in contact with the endothelial cells, found their way through the cell-cell junctions, then passed through and spread below. Fluorescence was used to visualize cancer cells and endothelial cells at the same time.

### Gel preparation

Polyacrylamide (PAA) gels were prepared following a previous protocol (43). Three gels containing OH bonds, enabling easy functionalization using fibronectin (20  $\mu\text{g}/\text{mL}$ ), were prepared by mixing acrylamide (30% weight per weight [w/w]), N-hydroxyethyl-acrylamide (5.85% w/w), and N,N-methylene-bisacrylamide (2% w/w) in different amounts (Sigma-Aldrich, St. Louis, MO). Three concentrations of bisacrylamide were used (0.1, 0.3, and 0.6 %), whereas the acrylamide (3.2%) and N-hydroxyethyl-acrylamide (1.25%) contents were fixed in the final 50 mM HEPES solution. Polymerization was initiated by incorporating N,N,N,N-tetramethylethylenediamine

(Sigma-Aldrich) and ammonium persulfate 10% solution (Sigma-Aldrich). 70- $\mu\text{m}$ -thick gels were prepared on a pretreated glass petri dish for better adhesion. After polymerization, samples were indented using AFM in contact mode or characterized using a rheometer to obtain the plateau modulus  $G_N^0$  (30). Since viscous effects were negligible, one could assume that  $E \sim 3 G_N^0$ . Both measurements agreed, with gel moduli  $E \sim 5 \pm 1$  kPa,  $8 \pm 1.5$  kPa, and  $28 \pm 3$  kPa. Gels were kept under humid conditions before cell seeding.

## AFM measurements

Experiments were carried out using a Nanowizard II atomic force microscope (JPK Instruments, Berlin, Germany) mounted on a ZEISS microscope (Observer D1; Carl Zeiss AG). All measurements were conducted in force modulation mode at 37°C using a petri dish heater (JPK Instruments). We used triangular silicon nitride cantilevers with four-sided pyramidal tips (MLCT, lever C; Bruker, Billerica, CA) and a nominal spring constant  $k \sim 0.01$  N m<sup>-1</sup> that was calibrated using the thermal noise method (44). Sharp tips are better suited to reach a higher spatial resolution. The applied force was lower than 2 nN in order to deform the substrate within the linear elastic regime where the Hertz indentation model can be used. When the cantilever tip gets into contact with the sample, the force acting on the cantilever increases to a previously chosen set point  $F$ , corresponding to an initial indentation  $\delta$ . The relationship is given by Sneddon's modification of the Hertzian contact mechanics model (45):

$$F = \frac{3 E \tan\theta}{4 (1 - \nu^2)} \delta^2 = \frac{3}{4} \bar{E} \tan\theta \delta^2, \quad (1)$$

where  $E$  is the cell's Young modulus,  $\nu$  is its Poisson ratio ( $\nu \sim 0.5$ ),  $\bar{E} = E/(1 - \nu^2)$  is the apparent modulus, and  $\theta = 20^\circ$  is the half pyramid angle.

AFM measurements were carried out at different geometrical locations, namely N, P, and E (14). N designates a location on top of the nucleus, but this does not mean that the nucleus is measured, since it is known that the actin cytoskeleton may be present in the thin layer between the nucleus and the cell membrane. P is usually located 10  $\mu\text{m}$  away from the geometrical center of the nucleus. Finally, E represents the edge of the cell, typically 5  $\mu\text{m}$  from the edge. These locations can be seen on the sketch in the inset of Fig. 1 B and in Fig. 2 C.

## Correction for indentation of a cell on a soft substrate: three-layer model

The precise analysis of the indentation experiment of a cell is highly dependent on its environment, which consists of soft (gel or HUVEC monolayer) and hard substrates (glass dish). The Hertz formula (Eq. 1) is only valid as long as the indentation depth is small compared to the sample thickness. The influence of the substrate grows with increasing indentation depth  $\delta$  and starts to be nonnegligible at about one-tenth of the substrate thickness  $h$  ( $\chi = \delta/h \sim 0.1$ ). This induces an overall strain of 10%, which is the accepted limit between small and large strains. More details on specific corrections have been pro-

posed for spherical or pyramidal indenters (13,36,46). In the case of indentation on a hard substrate, the cell elastic modulus appears much higher than expected, whereas on a soft gel, the cell modulus seems to be smaller.

The analysis presented here is a generalization of the Hertz formula for indentation of a composite substrate using power law functionals. The numerical model employed is based on the Papkovitch-Neuber potential representation of the displacement field and has been verified on various hard and soft combinations of substrates with different axially symmetric indenter shapes (37,47,48). In this experimental configuration, a cell (layer 1) is spread on a soft gel or HUVEC monolayer (layer 2) in contact with glass (layer 3). Let us call  $E_i$ ,  $\nu_i$ , and  $h_i$  the Young modulus, the Poisson ratio, and the thickness, respectively, where the indices  $i = 1, 2$ , and 3 denote the layers. Let us further remark that the glass substrate thickness is infinite ( $h_3 \rightarrow \infty$ ). This three-layer system is treated using power law functionals as detailed in Appendix A of the Supporting Material (Fig. S1) and has an apparent effective modulus:

$$\bar{E}_{(\delta)} = \bar{E}_3 + \frac{\bar{E}_2 + \frac{\bar{E}_1 - \bar{E}_2}{\eta_0} - \bar{E}_3}{1 + \left(\frac{\delta}{\beta_0 h_1}\right)^{\eta_0}} \frac{1}{1 + \left(\frac{\delta}{\beta_1 h_{12}}\right)^{\eta_1}}, \quad (2)$$

where  $h_{12} = h_1 + h_2$  and  $\beta_0$ ,  $\eta_0$ ,  $\beta_1$ , and  $\eta_1$  denote a series of shape parameters.

The model parameters  $\beta_0$ ,  $\eta_0$ ,  $\beta_1$ , and  $\eta_1$  were obtained (see Fig. S2) for relevant values of the cell modulus  $E_1$ , ranging from 1 to 20 kPa. The gel modulus  $E_2$  was given values between 5 and 28 kPa, as in the experiments, and the stiffness of the glass substrate  $E_3$  was considered very large ( $\sim 70$  MPa).  $h_1$ , the cell height, was measured experimentally on the nucleus, perinuclear region, and cell edge.  $h_2$  equaled 70  $\mu\text{m}$  for gels and was  $\sim 8 \mu\text{m}$  in the case of endothelial cells.

## Dynamic AFM measurements: $G'$ and $G''$

In order to carry out microrheology measurements, an initial indentation  $\delta_0$  was made, corresponding to the applied force  $F_0 = (3/4) \bar{E}_{(\delta_0)} \tan\theta \delta_0^2$  in Eq. 1. A small perturbation  $\delta(\omega)$  at angular frequency  $\omega$  ( $\omega = 2\pi f$  and the frequency  $f$  varies from 1 to 500 Hz) was superposed to the initial indentation  $\delta_0$ . During this procedure the tip remained in contact with the cell. We imposed the indentation  $\delta(\omega)$  and measured the force response  $F(\omega)$  (17,36). Because the perturbation was small, Eq. 1 was linearized around the equilibrium  $F_0 + F = (3/4) \bar{E}_{(\delta_0+\delta)} \tan\theta (\delta_0 + \delta)^2$ . At first order, the equation is as follows:

$$\frac{F}{\delta} \frac{2}{3 \tan\theta \delta_0} = \bar{E}_1 k_1(\chi_0, \chi_1) + \bar{E}_2 k_2(\chi_0, \chi_1) + \bar{E}_3 k_3(\chi_1), \quad (3)$$

where  $k_1$ ,  $k_2$ , and  $k_3$  are functions of the reduced indentations  $\chi_0 = (\delta_0/\beta_0 h_1)$ ,  $\chi_1 = (\delta_0/\beta_1 h_{12})$ . Parameters  $\eta_0$  and  $\eta_1$  from Eq. 2 are investigated in Appendix B of the Supporting Material:

$$\left\{ \begin{array}{l} k_1(\chi_0, \chi_1) = \frac{2(1 + \chi_0^{\eta_0})(1 + \chi_1^{\eta_1}) - \eta_0 \chi_0^{\eta_0} (1 + \chi_1^{\eta_1}) + \eta_1 \chi_1^{\eta_1} (1 + \chi_0^{\eta_0})}{2(1 + \chi_0^{\eta_0})^2 (1 + \chi_1^{\eta_1})^2} \\ k_2(\chi_0, \chi_1) = \frac{2\chi_0^{\eta_0} (1 + \chi_0^{\eta_0})(1 + \chi_1^{\eta_1}) + \eta_0 \chi_0^{\eta_0} (1 + \chi_1^{\eta_1}) - \eta_1 \chi_1^{\eta_1} \chi_0^{\eta_0} (1 + \chi_0^{\eta_0})}{2(1 + \chi_0^{\eta_0})^2 (1 + \chi_1^{\eta_1})^2} \\ k_3(\chi_1) = \frac{\chi_1^{\eta_1} (2 + \eta_1 + 2\chi_1^{\eta_1})}{2(1 + \chi_1^{\eta_1})^2} \end{array} \right. \quad (4)$$

By the correspondence principle of linear viscoelasticity, one uses a complex indentation  $\delta^*$  and force  $F^*$ . The hydrodynamic viscous drag  $i\omega b(0)$  is subtracted from  $F^*(\omega)/\delta^*(\omega)$  as explained previously (14,17).  $b(0)$  is estimated from the extrapolation of  $b(h)$  as a function of the tip-sample separation  $h$  to  $h = 0$ . For the sake of simplicity, it is not written in Eq. 5, which now reads, in complex form, as the following:

$$G^*(\omega) = G_1^*(\omega) = \frac{F^*(\omega)}{\delta^*(\omega)} \frac{1 - \nu_1}{3 \tan\theta \delta_0} \frac{1}{k_1} - E_2^* \frac{k_2}{k_1} \frac{1 - \nu_1}{2(1 - \nu_2^2)} - E_3^* \frac{k_3}{k_1} \frac{1 - \nu_1}{2(1 - \nu_3^2)}, \quad (5)$$

where  $G^*(\omega) = G' + iG''$  is the required cell complex viscoelastic modulus. Note that  $E_2^*$  and  $E_3^*$  can be complex as well. This is the case with endothelial cells ( $E_2^*$ ). For the third layer (glass),  $E_3^* = E_3$  is real. The initial indentation  $\delta_0$  and heights  $h_1$  and  $h_2$  are known experimentally. We impose  $\delta_0 = 500$  nm,  $h_1 \sim 10$   $\mu$ m on the nucleus (N);  $\delta_0 = 400$  nm,  $h_1 \sim 1$   $\mu$ m on the perinuclear region (P); and  $\delta_0 = 100$  nm,  $h_1 \sim 200$  nm on the edge (E). Functions  $k_1(\chi_0, \chi_1)$ ,  $k_2(\chi_0, \chi_1)$ , and  $k_3(\chi_1)$  are calculated using parameters  $\beta_0, \eta_0, \beta_1$ , and  $\eta_1$  as explained in Appendix B of the Supporting Material. The procedure requires an initial value of  $G_1^*(\omega)$  to start iterating (since  $k_1, k_2$ , and  $k_3$  in Eq. 5 depend on  $G_1^*$ ) to find the new  $G^* = G_1^*$ . Convergence is verified when the relative error is smaller than 1%, usually after 20 iterations.

### Modeling $G'$ and $G''$

After obtaining experimental rheology data using correction formulae, it was found that in most cases  $G'$  is flat at low frequencies, then increases to reach a power law with slope  $a$ , in terms of  $\omega$ . On the other hand,  $G''$  decreases with slope  $-n_f$  at low frequencies, then increases as a power law with the same exponent  $a$ . A simple model (14) was proposed:

$$G'(\omega) = G_N^0 + g_1 \omega^a \quad (6)$$

$$G''(\omega) = k_0 \omega^{-n_f} + b g_1 \omega^a, \quad (7)$$

where  $G_N^0$  is the so-called plateau modulus (Pa),  $a$  is the slope of  $G'$  and  $G''$  at high frequencies,  $b$  is the ratio  $G''/G'$  at high frequencies, and  $k_0$  and  $g_1$  are constants. Note that there exists a transition frequency  $f_T$  corresponding to the crossing of  $G'$  and  $G''$  at the higher frequencies, given by  $f_T = (1/2\pi)(G_N^0/(b-1)g_1)^{1/a}$ . This model is slightly different from previous ones (17,38) but assumes that universal power law behavior is not always met (49). In particular, at low frequencies, an elastic plateau modulus  $G_N^0$  is found. Parameters  $G_N^0$  and  $f_T$  will be used in what follows to quantify differences in cancer cell microrheological properties.

### Statistical analysis

Data were analyzed by a two-sample unpaired Student's  $t$ -test.  $n$  is the number of cells per condition. Values in Figs. 1, 2, 3, 4, and 5 correspond to  $***p < 0.001$ ,  $**p < 0.01$ ,  $*p < 0.05$ , and  $p > 0.05$  (not significant). Values were considered statistically significant when  $p < 0.05$ . Error bars in all figures represent the standard error (SE) of the mean (mean  $\pm$  SE).

## RESULTS

### Local microrheology depends on cell location and substrate stiffness

We first present results of the measurements made using T24 cancer cells on a soft gel ( $E_2 = 5$  kPa), and different locations are tested in Fig. 1, A–D. The contribution of the substrate has been taken into account. Both sets of data can be seen, with and without corrections. It is clear that the shear moduli

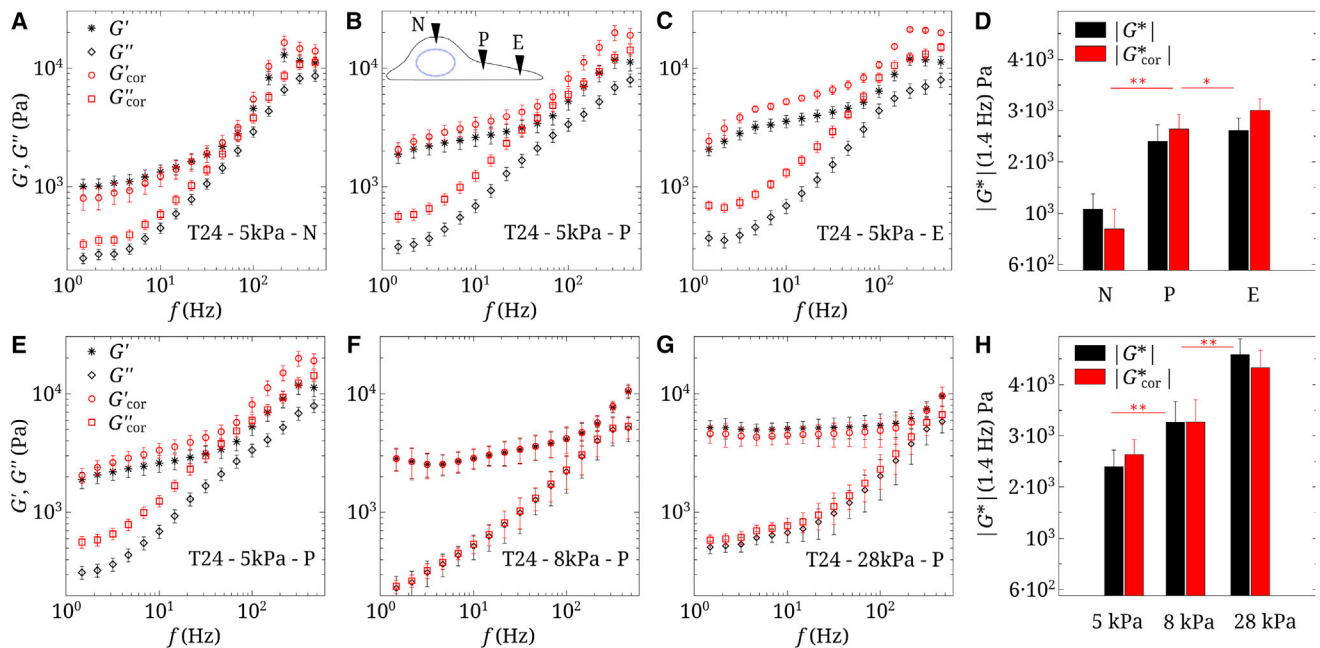

FIGURE 1 Raw and corrected viscoelastic moduli of T24 cells. (A–C) Data on a 5 kPa gel at three locations (nucleus (N), perinuclear region (P), and edge (E)) are shown. (D) Modulus  $|G^*|$  (1.4 Hz) at the three locations (N, P, and E) is shown. (E–G) Data measured in the perinuclear region (P) on three gels are shown ( $E_2 = 5, 8$ , and 28 kPa).  $n = 5$ , and error bars represent the mean  $\pm$  SE. (H) Modulus  $|G^*|$  (1.4 Hz) for the three gels is shown ( $E_2 = 5, 8$ , and 28 kPa). Statistical relevance is shown for corrected values of  $|G^*|$ . To see this figure in color, go online.

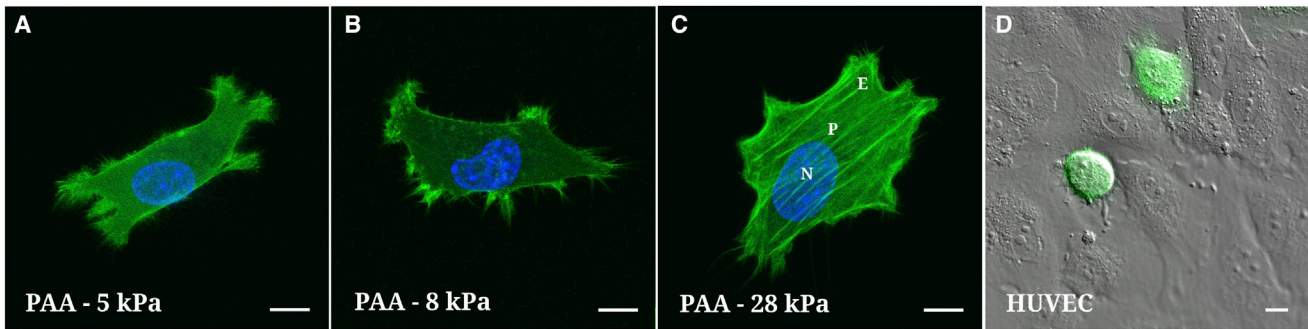

FIGURE 2 (A–C) Fluorescence of actin-GFP T24 cells on three PAA substrates ( $E_2 = 5, 8,$  and  $28$  kPa) with respective spreading areas ( $863, 1025,$  and  $1541 \mu\text{m}^2$ ). (D) A differential interference contrast image of a HUVEC monolayer with green fluorescent T24 cells superimposed is shown. Because of the round shape of the cells, it is not possible to define a lamellipodium or edge (E). The scale bar represents  $10 \mu\text{m}$ . To see this figure in color, go online.

$G'$  and  $G''$  are affected by the presence of the substrate. Note also that the measurements depend on tip position. To clarify this, Fig. 1 D shows the modulus  $|G^*| = (G'^2 + G''^2)^{1/2}$  at  $1.4$  Hz, increasing as the point of measurement moves from the center (nucleus (N)) to the perinuclear region (P) and toward the lamellipodium (or edge (E)).

We next turn to the evolution of the dynamic moduli when substrate stiffness  $E_2$  is increasing. Three gels were used:  $E_2 = 5, 8,$  and  $28$  kPa. This is presented in Fig. 1, E–H. At low frequencies,  $|G^*|$  ( $1.4$  Hz) increases when  $E_2$  increases, as seen in Fig. 1, H. This can be due to the cell actin microstructure or the spreading of cells on the substrate (14). In Fig. 2, A–C, T24 cells plated on PAA gels ( $5, 8,$  and  $28$  kPa) are shown using confocal microscopy: they spread more, become thinner, and develop more actin fibers on rigid gels. Note that the variation of  $|G^*|$  with  $E_2$  (Fig. 1 H), because of the thinning of cells and enhanced substrate effects, is less important after corrections are made. It can be concluded that the increase in cell elasticity comes rather from the cytoskeleton through creation of aligned actin fibers.

### Cell microrheological properties are linked to cell invasiveness

The influence of invasiveness was studied next. Three cancer cells of increasing invasiveness (RT112 < T24 < J82)

were plated on the  $8$  kPa PAA gel. Their viscoelastic properties are shown in Fig. 3, A–C and display a common trend, with lower moduli  $G'$  and  $G''$  as the invasiveness increases. Substrate corrections are shown together with raw data. One can conclude that the microrheological properties of cancer cells depend on their invasiveness (i.e., moduli are lower for the more invasive cells). This is clearly shown for  $|G^*|$  ( $1.4$  Hz) in Fig. 3 D. Such results were previously reported for the global elastic moduli  $E$  of cancer cells (5), their local elasticity (6,7,50), or viscoelasticity (14,35). Note here that applying substrate corrections has a significant effect on the results.

### Invasive cells exhibit an inverse behavior on the HUVEC substrate

We next characterize the behavior of the same cancer cells in contact with the endothelial monolayer. This layer has similar mechanical properties (51) as the  $8$  kPa PAA gel studied above. Therefore, one could wonder what effects can be found regarding cell spreading or cell viscoelasticity and whether this could affect transendothelial migration. We find that on the HUVEC monolayer, cells do not spread much and remain round (Fig. 2 D), so it is hard to distinguish a lamellipodium (or edge (E)). Only measurements on the nucleus (N) and perinuclear region (P) were

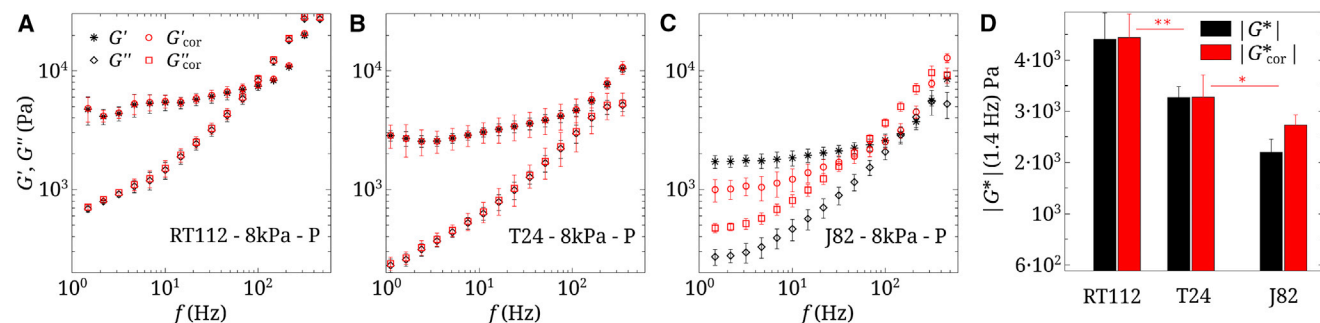

FIGURE 3 (A–C) Raw and corrected viscoelastic moduli of three cancer cells (RT112, T24, and J82) on the  $8$  kPa gel.  $n = 5$ , and error bars represent the mean  $\pm$  SE. (D) Shown are corresponding values of  $|G^*|$  ( $1.4$  Hz) for the three cell types. Statistical relevance is shown for corrected values of  $|G^*|$ . To see this figure in color, go online.

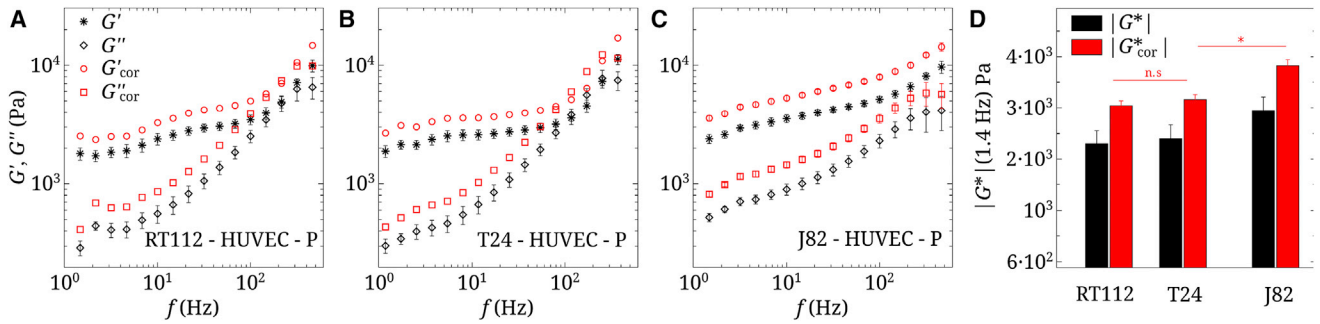

FIGURE 4 (A–C) Raw and corrected viscoelastic moduli of three cancer cells (RT112, T24, and J82), measured in the perinuclear region (P), on a HUVEC monolayer.  $n = 5$ , and error bars represent the mean  $\pm$  SE. (D) Shown are corresponding values of  $|G^*|$  (1.4 Hz) for the three cell types. Statistical relevance is shown for corrected values of  $|G^*|$ . To see this figure in color, go online.

performed. Fig. 4, A–D shows these measurements on the perinuclear region (P). Note that corrections in Fig. 4, A–C use the real viscoelastic properties of endothelial cells, measured separately (51). In this case the viscoelastic properties of cancer cells show a different trend. Fig. 4 D summarizes the evolution of  $|G^*|$  (1.4 Hz), showing that more invasive cells are slightly stiffer in the perinuclear region. Finally, the crossover frequency  $f_T$  varies significantly. For J82 cells,  $f_T$  cannot be reported because this crossover is out of the range of frequencies used. In the next part we will compare quantitative numbers, such as  $G_N^0$  and  $f_T$ .

**Parameters  $G_N^0$  and  $f_T$  increase with substrate elasticity**

In order to quantify the changes highlighted in the previous part, two parameters were studied, namely the plateau modulus  $G_N^0$  (Fig. 5, A–C) and the transition frequency  $f_T$  (Fig. 5, D–F). These parameters were defined earlier in Eq. 6. Their evolution is shown at locations N and P for all cell types. To compare results on HUVECs and gels, we assume that  $E_2 \sim 3 G_N^0 \sim 9$  kPa for endothelial cells (51). Fig. 5 represents the evolution of  $G_N^0$  and  $f_T$  in terms

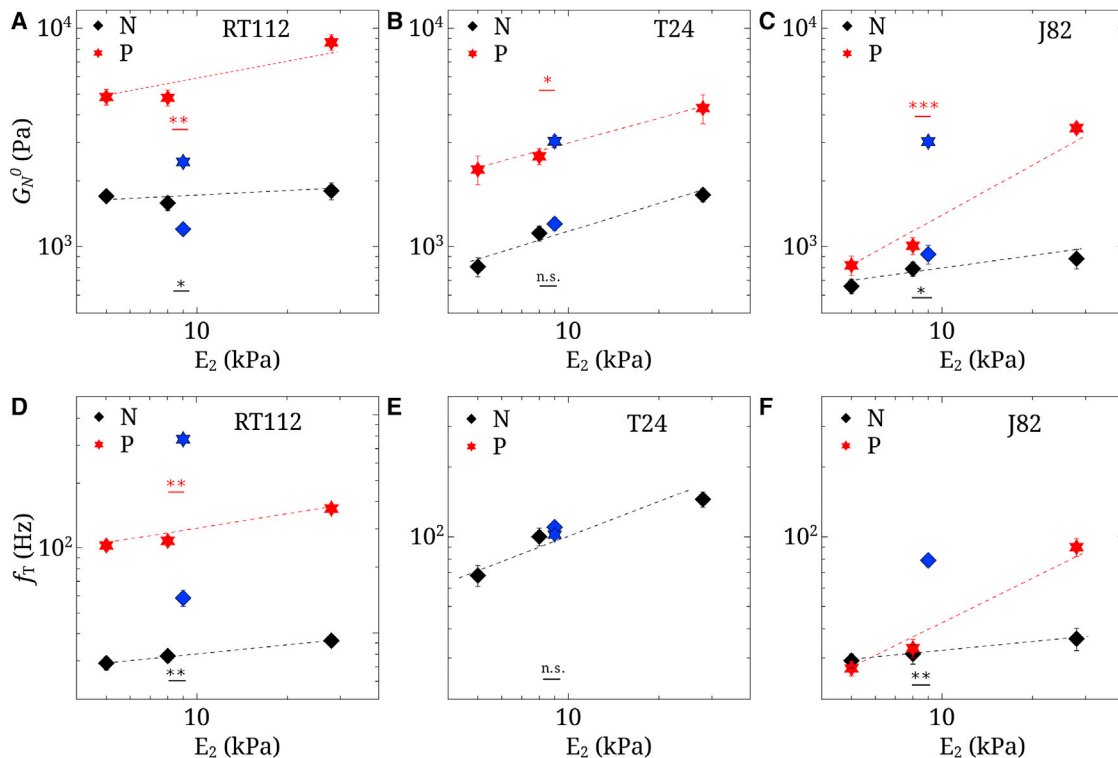

FIGURE 5 Parameters  $G_N^0$  (A–C) and  $f_T$  (D–F) for RT112, T24, and J82 cancer cells, both on rigid substrates ( $E_2 = 5, 8,$  and  $28$  kPa) and a HUVEC monolayer ( $E_2 \sim 9$  kPa). P represents the perinuclear region and N represents the nucleus.  $n = 5$ , and error bars represent the mean  $\pm$  SE. The points at 9 kPa represent data on the HUVEC substrate. The lines are just a guide for the eye. Statistical relevances of  $G_N^0$  and  $f_T$  are shown when comparing the HUVEC substrate with the gel of rigidity  $E_2 = 8$  kPa. To see this figure in color, go online.

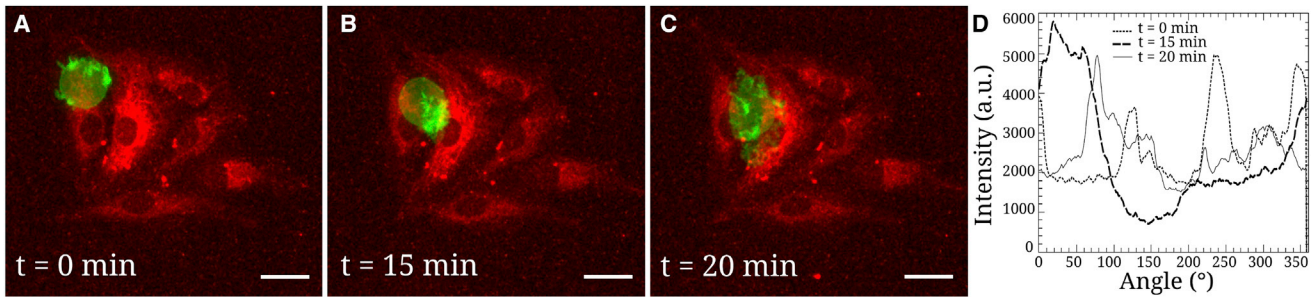

FIGURE 6 Transmigration of a J82 cancer cell in contact with the endothelium. (A) Initially the cell is round ( $t = 0$  min) with actin concentrated at the periphery. (B) followed by an ovoid shape with actin relocation close to the endothelial gap ( $t = 15$  min), (C) then it transmigrates and spreads below the endothelium ( $t = 20$  min). The scale bar represents  $25 \mu\text{m}$ . (D) Shown are polar representations of the actin intensity (in arbitrary units) at the cell edge, measured from the center of geometry, at different times. Note in particular the large actin area for  $t = 15$  min. a.u., arbitrary units. To see this figure in color, go online.

of elasticity  $E_2$ , with HUVECs being close to the elastic substrate  $E_2 = 8$  kPa. Justification of the model for the endothelial monolayer as a thin substrate can be found in Appendix C of the [Supporting Material](#).  $G_N^0$  and  $f_T$  both increase linearly (log-log scale), with substrate rigidity  $E_2$  at a higher rate for location P as compared to N. One could expect the HUVEC data to lie along the evolution curve. On the contrary, the values found for  $G_N^0$  and  $f_T$  are quite different from the ones expected for an equivalent elastic substrate.  $G_N^0$  is higher in the perinucleus region (P) than on the nucleus (N). With the HUVEC monolayer,  $G_N^0$  is higher than expected for J82, equal for T24, and lower for RT112 cells. Finally, regarding  $f_T$  (when defined), differences are also found on the HUVECs: RT112 exhibits larger  $f_T$ , a T24 value exists only on HUVECs at the perinucleus (P), and  $f_T$  for invasive J82 cells shows a large change on the nucleus (N) but is not defined on the perinucleus (P). The presence of the endothelium (HUVEC) indeed shows differences that could have been expected because of the different nature of the substrates, both in terms of cytoskeleton as well as adhesion molecules. Thus, the next section investigates the dynamic behavior of J82 cancer cells in contact with the endothelium until transmigration is achieved. The actin cytoskeleton organization (52) will be followed and linked with microrheological changes observed above.

### Transendothelial migration requires actin reorganization of cancer cells

When cancer cells are in contact with the endothelium substrate, they may possibly transmigrate (3), so it is important to understand how they adapt their actin cytoskeleton. This effect could be related to the mechanical features shown previously and to mechanosensitivity. One example of these features is shown in Fig. 6. Cancer cells were allowed to sediment and to adhere to endothelial cell patterns. We selected one pattern with only one cancer cell adhering and followed it when it interacted with the HUVEC monolayer. The cell shape and actin organization could be seen

during the course of transmigration. Initially, the cell was round ( $t = 0$ , Fig. 6 A) and the actin seemed to be concentrated on the sides. This local concentration can be linked to the cell's mechanical properties, as measured above. Then the cell became ovoid ( $t = 15$  min, Fig. 6 B) and actin seemed to relocate close to the junction, as if the cell was pushing harder to penetrate. Finally, the cell squeezed through the junction and was found below the endothelial monolayer ( $t = 20$  min, Fig. 6 C), where it had spread. Fig. 6 D also shows the polar distribution of actin along the cell edge. At time  $t = 15$  min, there was indeed a very large actin concentration in the ( $0$ – $70^\circ$ ) angular range, close to the endothelial gap.

### DISCUSSION

The choice of bladder cancer cells comes from previous studies by the authors (39–41), in which various properties associated with invasiveness, such as adhesion and rheology, were reported. RT112 cancer cells are moderately differentiated, whereas T24 and J82 cancer cells are poorly differentiated and have a higher malignancy potential (especially J82 cells). In addition, these cancer cells were used before as models for molecular classification (53). They exhibited various expression degrees of mTOR-associated genes, which is relevant for chemotherapy. Adhesion molecules or ligands (leukosialin [CD43] and mucin 1 [MUC1]) present at the cancer cell surface have been identified (40,41,54) as well as receptors (ICAM-1, VCAM-1) on the HUVEC side (39). Note that CD43 and MUC1 are expressed more on invasive cells, especially T24 and J82 cell lines. When plated on gels functionalized with fibronectin, cancer cell receptors are more likely to be  $\alpha_v\beta_3$  or  $\alpha_5\beta_1$  integrins (55) that interact with the ECM (fibronectin). In addition, the expressions of  $\alpha_5$  and  $\beta_1$  are particularly relevant for cancer cells such as T24 (56). Finally, during the process of metastasis, it was shown that the NF $\kappa$ -B pathway can be involved in the overexpression of adhesion molecules (39).

## Rheological data corrections

The effect of a cell adhering on a rigid substrate has been investigated previously and corrections have been proposed (13,14,46). But softer substrates with a rigidity close to that of the cell can also play a role; therefore, it is necessary to account for the effect of both substrates—the soft one with elasticity  $E_2$  and the rigid one with elasticity  $E_3$  (glass, for instance)—to determine  $E_1$  (the cell elastic modulus) when the environment has different stiffnesses or thicknesses. Here we used a previous model (48) to investigate these properties numerically, taking into account the exact tip shape (a rounded cone), as considered earlier by other authors (57). An important result is that depending on substrate stiffness, cell modulus  $E_1$  can be overestimated (when  $E_1 < E_2$ ) or underestimated (when  $E_1 > E_2$ ). This is illustrated in Figs. S1–S3: the effective modulus can be a decreasing or increasing function of the reduced indentation. The other important parameters are the indentation  $\delta$ , cell height  $h_1$ , and substrate thickness  $h_2$ . Note that the spreading of cells on soft gels was studied earlier (22) when gel thickness was varied in the particular case of mesenchymal stem cells. Cells spread more when the thickness  $h_2$  decreased, and the cell area leveled out for high thicknesses. This latter statement is in agreement with our model at small indentations (or large heights), as the apparent stiffness also shows a plateau in Fig. S1, corresponding to the expected modulus. Finally, our model was applied to dynamic rheology and linearized in Eq. 5 to obtain the complex dynamic viscoelastic modulus  $G^*$ , accounting for substrate effects, including both viscoelasticity and thickness. Validation of the model in simple cases can be found in Appendix B of the Supporting Material.

## Cell stiffens away from nucleus

First, rheological measurements were made at different locations. Fig. 1, A–D shows the raw data obtained at positions N, P, and E, indicating respectively the nucleus, perinuclear region, and cell edge (see sketch as an inset in Fig. 1 B and positions indicated in Fig. 2 C). These locations were chosen based on geometry and microstructure considerations. The data were corrected, as explained above, because of the presence of the gel (5 kPa). Corrections were not negligible, as shown by differences in the  $G'$  and  $G''$  moduli of up to 40%. The final corrected value of the cell shear elastic modulus  $|G^*|$  at low frequency was around 1 kPa on the nucleus (N), thus  $E_1 \sim 3 |G^*| \sim 3$  kPa. This means the substrate is stiffer (5 kPa), so we found an overestimated value of  $|G^*|$  in the experiments. Regarding  $G''$ , the effects were more subtle, but  $G''$  increased after correction (see Fig. S4 in Appendix C of the Supporting Material). On the perinuclear region (P) or edge (E),  $|G^*| > 1.7$  kPa and  $E_1 > 5$  kPa, so the substrate was softer, and therefore  $|G^*|$  was underestimated.

After making these corrections, we noted (Fig. 1 D) that the cell was stiffer when going from the center (3 kPa) to the edge (9 kPa). It is not so surprising that the center was less rigid because the atomic force microscope tip feels the cytoskeleton as well as the nucleus at position N. Isolated nuclei are known to have a Young modulus  $E \sim 5$ –8 kPa (15), so 3 kPa is the average of nucleus, cytoplasm, and membrane effects. The edge (E) or perinucleus (P), on the other hand, contain actin bundles, which are quite rigid, as observed earlier (13,14). Disruption of actin filaments using latrunculin A fluidifies the cytoskeleton, whereas Y27632 (an actomyosin-inhibiting drug) rigidifies the cell edge (14).

## $|G^*|$ increases with substrate stiffness $E_2$

Interesting results are presented in Fig. 1, E–H, in which the influence of substrate rigidity ( $E_2 = 5$ –8–28 kPa) is shown. Corrections show an increase of the modulus  $|G^*|$  after correction when  $E_2 = 5$  kPa, hardly no change for  $E_2 = 8$  kPa, and an increase for  $E_2 = 28$  kPa (Fig. 1 H). We find  $|G^*| \sim 2.5$ –3.2–4.3 kPa or  $E_1 \sim 7.5$ –9.6–12.9 kPa to be compared to 5–8–28 kPa, respectively. We can conclude that cells adapt their rheology (i.e., are mechanosensitive). A global trend is a cell elasticity increase with substrate stiffness, and we have seen that it is related to the development of actin fibers on stiffer substrates (Fig. 2, A–C). This is in agreement with previous works (19,20,22,58) and the development of stress fibers in connection with focal adhesions.

## $|G^*|$ decreases with invasiveness as cells become glassy

The role of invasiveness on cell microrheological properties is shown in Fig. 3 using three cell types (RT112, T24, and J82) by increasing order of invasiveness. When comparing measurements on the perinuclear area (P), a clear decrease in viscoelastic moduli is observed with invasiveness, both for  $G'$  and  $G''$ , and this effect persists after corrections. This confirms common trends found in the literature (5–7,50), but more complete data are found here because both  $G'$  and  $G''$  as well as  $|G^*|$  are obtained in Fig. 3. In this respect, the more invasive J82 cell shows a smaller  $f_T$  (crossing of  $G'$  and  $G''$ ) around 40 Hz, revealing an earlier transition to the disordered glassy state. This was also observed for other malignant cells, such as MCF-7 and MDA-MB-231 (35).

## Most invasive cells stiffen on a HUVEC monolayer

Fig. 4 illustrates measurements carried out with the three cell types on a HUVEC monolayer at position P. This position was chosen in order to compare  $|G^*|$  on HUVECs and PAA substrates. As cancer cells do not spread when in contact with the HUVEC monolayer (Fig. 2), only two locations (N and P) are common between gels and HUVECs. One



could argue that the proteins at the surface of the latter two substrates are different in both cases. Here we can assume that bonds are all strong ones because they are receptor-ligand bonds involving integrins and fibronectin on gels and ICAM-1 versus other ligands (CD43 and MUC1) in the case of the HUVEC substrate (41). So the comparison can hold. To correct the data, we assume that the HUVEC monolayer behaves like a thin viscoelastic layer, as explained in Fig. S5 in Appendix C of the Supporting Material. Indeed, in the range of parameters studied, the small indentation ( $\sim 500$  nm) ensures no differences whatever the height of the soft substrate is, so the uneven HUVEC monolayer (2–8  $\mu\text{m}$ ) is only affecting results through its viscoelastic properties, but not its height.

Data on the viscoelastic HUVEC substrate show slightly increasing values of  $|G^*|$  with invasiveness, which is the opposite of the results found previously on gels.  $|G^*|$  increases from 3 kPa (RT112 cells) up to 3.8 kPa (J82 cells) in Fig. 4 D. To investigate these changes more accurately, we use the model described previously.

### $G_N^0$ increases with substrate stiffness, except on HUVECs

The rheological model (14) was used to fit the data in Figs. 1, 2, 3, and 4 to identify  $G_N^0$ , the plateau modulus, and  $f_T$ , the transition frequency. The other parameters  $a$ ,  $b$ ,  $k_0$ , and  $g_1$  were also obtained but are not discussed further. To include the effect of the endothelial substrate, we used previous data on HUVECs (51) in which the elasticity was found to be  $E_2 \sim 9$  kPa. This value is also included when plotting  $G_N^0$  (Fig. 5, A–C) and  $f_T$  (Fig. 5, D–F) at positions N and P. The substrates have been chosen to cover a large range of elasticities (5–28 kPa), and the evolution of  $G_N^0$  in log-log scale displays a power law, with a positive slope for position (P), as observed before when averaging different locations (23). At position (N),  $G_N^0$  seems to increase less with substrate stiffness, in agreement with indentation on the nucleus, where no difference was found (18). Thus, our results reconcile these two studies (18,23) by comparing measurements at different locations. When the cells become more invasive (excluding HUVECs), the slope of  $G_N^0$  versus  $E_2$  at position (P) seems to increase, suggesting that more invasive cell types are more mechanosensitive to gel stiffness. Finally,  $f_T$  increases with  $E_2$ , and therefore cells become more elastic and do not switch to the glassy state. Note that in some cases,  $f_T$  could not be determined since there is no crossing of  $G'$  and  $G''$ .

### Invasive J82 cells stiffen in the perinuclear area on HUVECs

Finally, we show that RT112 cells become less rigid on HUVECs as opposed to invasive J82 cells, especially on the perinucleus P (Fig. 5, A–C). These results are also

observed on the nucleus (N) but are less visible. This could be the sign of invasive J82 cells starting to rigidify (P) in order to break through the endothelium and let the softer nucleus (N) collapse through the endothelial gap. This process is not explained yet, although morphology changes may come from activity of the Rho family of GTPases, which may control the cytoskeleton and actomyosin contractility (52). In any case, this suggests a strong reorganization or mechanosensitivity of the cytoskeleton of invasive cancer cells, compatible with the current rheology data. Indeed, the transition frequency  $f_T$  changes a lot on the perinucleus (P), from less invasive RT112 cells ( $f_T \sim 300$  Hz) to invasive T24 cells ( $f_T \sim 100$  Hz) and finally to J82 cells that show no transition (Fig. 5, D–F). This latter case is a further indication of a new dynamic organization of the cytoskeleton—corresponding to a glassy state and giving rise to the same slopes of  $G'$  and  $G''$  (17,35,38)—and could be a signature of invasiveness. Thus, we show for the first time to our knowledge the importance of the transition frequency  $f_T$ . This parameter, together with  $G_N^0$ , shows that few changes occur around the nucleus as opposed to the perinuclear region, highlighting possible mechanotransduction pathways between the cytoskeleton and the nucleus associated with linker proteins (59).

### J82 stiffening correlates with actin reorganization during transmigration

Finally, to illustrate the change in cancer cell mechanics when in contact with the HUVEC monolayer, transendothelial migration was followed in order to study the relationship with microrheology measured above. Fig. 6 shows a J82 cancer cell transmigrating through a small pattern of HUVECs (6–8 cells). At the onset of transmigration ( $t = 0$  min, Fig. 6 A), the GFP-actin J82 cell exhibits reinforcement of its cytoskeleton at the periphery, as shown by high-fluorescence-intensity areas. This seems to go along with our above results and Fig. 5, which shows a higher  $G_N^0$  in the perinuclear region (as compared to the nuclear region). This suggests that the cell edges are required to maintain stress at the periphery. Next, the actin cortex seems to reinforce below the nucleus ( $t = 15$  min, Fig. 6 B) to push through the gap. It is not yet possible to measure this with the atomic force microscope from below, but our previous rheology data support the dynamic nature of the cell cytoskeleton in a metastable state. Finally, the cell is able to go through the gap and spread on the gel below ( $t = 20$  min, Fig. 6 C) to complete transmigration (see also Movie S1 and Appendix D in the Supporting Material). This actin reinforcement is also notable in Fig. 6 D, in which the intensity indicates a very localized actin structure corresponding to the precise location of the endothelial gap. Of course, such results need to be confirmed further. In any case, this explanation provides an answer to the controversy on softer

cells as opposed to rigid ones, indicating that local rheology is essential to understand this pathological mechanism: higher rigidity on the edge is required first, followed by rapid actin reorganization to push through the gap until the nucleus follows.

## CONCLUSIONS

In this work, we have first explained the need for correcting AFM measurements in order to obtain reliable cell viscoelastic data, which are very sensitive with respect to substrate rigidity and thickness. Our results have shown that cancer cell properties are local, vary with invasiveness, and such cells adapt their rheology depending on substrate elasticity. In the case of an endothelial substrate, mechano-sensitive effects were observed. With respect to this behavior and possible transendothelial migration leading to metastasis, invasive cancer cells exhibited locally tuned and highly dynamic mechanical properties. Further experiments are now possible to obtain real-time in vitro cell mechanical properties during transmigration.

## SUPPORTING MATERIAL

Supporting Materials and Methods, five figures, and one movie are available at [http://www.biophysj.org/biophysj/supplemental/S0006-3495\(18\)30070-5](http://www.biophysj.org/biophysj/supplemental/S0006-3495(18)30070-5).

## AUTHOR CONTRIBUTIONS

Y.A. performed all experiments and analyzed data. A.C. developed indentation models. V.M.L., V.S.R., R.M., V.L., A.D., and C.V. contributed analytical and experimental tools. A.D, V.M.L., and C.V. designed research. Y.A., A.D., and C.V. wrote the article.

## ACKNOWLEDGMENTS

We thank the Agence Nationale de la Recherche for grant No. 12-BS09-020-01 (TRANSMIG) and the Nanoscience Foundation for support of the AFM platform. This work has been partially supported by the LabEx Tec 21 (Investissements d'Avenir: grant agreement No. ANR-11-LABX-0030).

## REFERENCES

- Verdier, C., J. Etienne, ..., L. Preziosi. 2009. Review: rheological properties of biological materials. *C. R. Phys.* 10:790–811.
- Wirtz, D., K. Konstantopoulos, and P. C. Searson. 2011. The physics of cancer: the role of physical interactions and mechanical forces in metastasis. *Nat. Rev. Cancer.* 11:512–522.
- Chotard-Ghodsni, R., O. Haddad, ..., A. Duperray. 2007. Morphological analysis of tumor cell/endothelial cell interactions under shear flow. *J. Biomech.* 40:335–344.
- Weder, G., M. C. Hendriks-Balk, ..., A. Mariotti. 2014. Increased plasticity of the stiffness of melanoma cells correlates with their acquisition of metastatic properties. *Nanomedicine (Lond.)*. 10:141–148.
- Gück, J., S. Schinkinger, ..., C. Bilby. 2005. Optical deformability as an inherent cell marker for testing malignant transformation and metastatic competence. *Biophys. J.* 88:3689–3698.
- Cross, S. E., Y.-S. Jin, ..., J. K. Gimzewski. 2007. Nanomechanical analysis of cells from cancer patients. *Nat. Nanotechnol.* 2:780–783.
- Lekka, M. 2016. Discrimination between normal and cancerous cells using AFM. *Bionanoscience.* 6:65–80.
- Staunton, J. R., B. L. Doss, ..., R. Ros. 2016. Correlating confocal microscopy and atomic force indentation reveals metastatic cancer cells stiffen during invasion into collagen I matrices. *Sci. Rep.* 6:19686.
- Bischofs, I. B., F. Klein, ..., U. S. Schwarz. 2008. Filamentous network mechanics and active contractility determine cell and tissue shape. *Biophys. J.* 95:3488–3496.
- Guo, M., A. J. Ehrlicher, ..., D. A. Weitz. 2013. The role of vimentin intermediate filaments in cortical and cytoplasmic mechanics. *Biophys. J.* 105:1562–1568.
- Brangwynne, C. P., F. C. MacKintosh, ..., D. A. Weitz. 2006. Microtubules can bear enhanced compressive loads in living cells because of lateral reinforcement. *J. Cell Biol.* 173:733–741.
- Rigato, A., F. Rico, ..., S. Scheuring. 2015. Atomic force microscopy mechanical mapping of micropatterned cells shows adhesion geometry-dependent mechanical response on local and global scales. *ACS Nano.* 9:5846–5856.
- Santos, J. A. C., L. M. Rebêlo, ..., J. S. de Sousa. 2012. Thickness-corrected model for nanoindentation of thin films with conical indenters. *Soft Matter.* 8:4441–4448.
- Abidine, Y., V. M. Laurent, ..., C. Verdier. 2015. Local mechanical properties of bladder cancer cells measured by AFM as a signature of metastatic potential. *Eur. Phys. J. Plus.* 130:202.
- Caille, N., O. Thoumine, ..., J.-J. Meister. 2002. Contribution of the nucleus to the mechanical properties of endothelial cells. *J. Biomech.* 35:177–187.
- Thiam, H.-R., P. Vargas, ..., M. Piel. 2016. Perinuclear Arp2/3-driven actin polymerization enables nuclear deformation to facilitate cell migration through complex environments. *Nat. Commun.* 7:10997.
- Alcaraz, J., L. Buscemi, ..., D. Navajas. 2003. Microrheology of human lung epithelial cells measured by atomic force microscopy. *Biophys. J.* 84:2071–2079.
- Rianna, C., and M. Radmacher. 2017. Comparison of viscoelastic properties of cancer and normal thyroid cells on different stiffness substrates. *Eur. Biophys. J.* 46:309–324.
- Discher, D. E., P. Janmey, and Y.-L. Wang. 2005. Tissue cells feel and respond to the stiffness of their substrate. *Science.* 310:1139–1143.
- Lo, C. M., H. B. Wang, ..., Y. L. Wang. 2000. Cell movement is guided by the rigidity of the substrate. *Biophys. J.* 79:144–152.
- Engler, A., L. Bacakova, ..., D. Discher. 2004. Substrate compliance versus ligand density in cell on gel responses. *Biophys. J.* 86:617–628.
- Buxboim, A., K. Rajagopal, ..., D. E. Discher. 2010. How deeply cells feel: methods for thin gels. *J. Phys. Condens. Matter.* 22:194116.
- Solon, J., I. Levental, ..., P. A. Janmey. 2007. Fibroblast adaptation and stiffness matching to soft elastic substrates. *Biophys. J.* 93:4453–4461.
- Étienne, J., J. Fouchard, ..., A. Asnacios. 2015. Cells as liquid motors: mechanosensitivity emerges from collective dynamics of actomyosin cortex. *Proc. Natl. Acad. Sci. USA.* 112:2740–2745.
- Acerbi, I., L. Cassereau, ..., V. M. Weaver. 2015. Human breast cancer invasion and aggression correlates with ECM stiffening and immune cell infiltration. *Integr. Biol.* 7:1120–1134.
- van Helvert, S., and P. Friedl. 2016. Strain stiffening of fibrillar collagen during individual and collective cell migration identified by AFM nanoindentation. *ACS Appl. Mater. Interfaces.* 8:21946–21955.
- Alvarez-Elizondo, M. B., and D. Weihs. 2017. Cell-gel mechanical interactions as an approach to rapidly and quantitatively reveal invasive subpopulations of metastatic cancer cells. *Tissue Eng. Part C Methods.* 23:180–187.
- Zhu, J., L. Liang, ..., L. Liu; U.S.-China Physical Sciences-Oncology Alliance. 2015. Enhanced invasion of metastatic cancer cells via extracellular matrix interface. *PLoS One.* 10:e0118058.

29. Butcher, D. T., T. Alliston, and V. M. Weaver. 2009. A tense situation: forcing tumour progression. *Nat. Rev. Cancer*. 9:108–122.
30. Jordan, A., A. Duperray, ..., C. Verdier. 2010. Breakdown of cell-collagen networks through collagen remodeling. *Biorheology*. 47:277–295.
31. Peschetola, V., V. M. Laurent, ..., C. Verdier. 2013. Time-dependent traction force microscopy for cancer cells as a measure of invasiveness. *Cytoskeleton (Hoboken)*. 70:201–214.
32. Mierke, C. T., D. Rösel, ..., J. Brábek. 2008. Contractile forces in tumor cell migration. *Eur. J. Cell Biol.* 87:669–676.
33. Koch, T. M., S. Münster, ..., B. Fabry. 2012. 3D Traction forces in cancer cell invasion. *PLoS One*. 7:e33476.
34. Smith, B. A., B. Tolloczko, ..., P. Grütter. 2005. Probing the viscoelastic behavior of cultured airway smooth muscle cells with atomic force microscopy: stiffening induced by contractile agonist. *Biophys. J.* 88:2994–3007.
35. Rother, J., H. Nöding, ..., A. Janshoff. 2014. Atomic force microscopy-based microrheology reveals significant differences in the viscoelastic response between malign and benign cell lines. *Open Biol.* 4:140046.
36. Abidine, Y., V. M. Laurent, ..., C. Verdier. 2015. Physical properties of polyacrylamide gels probed by AFM and rheology. *Europhys. Lett.* 109:38003.
37. Korsunsky, A. M., and A. Constantinescu. 2009. The influence of indenter bluntness on the apparent contact stiffness of thin coatings. *Thin Solid Films*. 517:4835–4844.
38. Trepatt, X., G. Lenormand, and J. J. Fredberg. 2008. Universality in cell mechanics. *Soft Matter*. 4:1750–1759.
39. Haddad, O., R. Chotard-Ghodsnia, ..., A. Duperray. 2010. Tumor cell/endothelial cell tight contact upregulates endothelial adhesion molecule expression mediated by NF $\kappa$ B: differential role of the shear stress. *Exp. Cell Res.* 316:615–626.
40. Laurent, V. M., A. Duperray, ..., C. Verdier. 2014. Atomic force microscopy reveals a role for endothelial cell ICAM-1 expression in bladder cancer cell adherence. *PLoS One*. 9:e98034.
41. Sundar Rajan, V., V. M. Laurent, ..., A. Duperray. 2017. Unraveling the receptor-ligand interactions between bladder cancer cells and the endothelium using AFM. *Biophys. J.* 112:1246–1257.
42. Palecek, S. P., J. C. Loftus, ..., A. F. Horwitz. 1997. Integrin-ligand binding properties govern cell migration speed through cell-substratum adhesiveness. *Nature*. 385:537–540.
43. Grevesse, T., M. Versaevel, ..., S. Gabriele. 2013. A simple route to functionalize polyacrylamide hydrogels for the independent tuning of mechanotransduction cues. *Lab Chip*. 13:777–780.
44. Butt, H.-J., and M. Jaschke. 1995. Calculation of thermal noise in atomic force microscopy. *Nanotechnology*. 6:1–7.
45. Bilodeau, G. G. 1992. Regular pyramid punch problem. *J. Appl. Mech.* 59:519–523.
46. Dimitriadis, E. K., F. Horkay, ..., R. S. Chadwick. 2002. Determination of elastic moduli of thin layers of soft material using the atomic force microscope. *Biophys. J.* 82:2798–2810.
47. Korsunsky, A. M., and A. Constantinescu. 2006. Work of indentation approach to the analysis of hardness and modulus of thin coatings. *Mater. Sci. Eng. A*. 423:28–35.
48. Constantinescu, A., A. Korsunsky, ..., A. Oueslati. 2013. Symbolic and numerical solution of the axisymmetric indentation problem for a multilayered elastic coating. *Int. J. Solids Struct.* 50:2798–2807.
49. Stamenović, D., N. Rosenblatt, ..., D. E. Ingber. 2007. Rheological behavior of living cells is timescale-dependent. *Biophys. J.* 93:L39–L41.
50. Lekka, M., J. Lekki, ..., A. Hryniewicz. 1999. Local elastic properties of cells studied by SFM. *Appl. Surf. Sci.* 141:345–349.
51. Abidine, Y. 2015. Propriétés mécaniques de cellules cancéreuses mesurées par AFM. PhD thesis. Université Grenoble Alpes.
52. Reymond, N., B. B. d'Água, and A. J. Ridley. 2013. Crossing the endothelial barrier during metastasis. *Nat. Rev. Cancer*. 13:858–870.
53. Hau, A. M., M. Nakasaki, ..., D. E. Hansel. 2017. Differential mTOR pathway profiles in bladder cancer cell line subtypes to predict sensitivity to mTOR inhibition. *Urol. Oncol.* 35:593–599.
54. Kaur, S., N. Momi, ..., S. K. Batra. 2014. Altered expression of transmembrane mucins, MUC1 and MUC4, in bladder cancer: pathological implications in diagnosis. *PLoS One*. 9:e92742.
55. Kang, H. W., W.-J. Kim, and S.-J. Yun. 2017. The role of the tumor microenvironment in bladder cancer development and progression. *Transl. Cancer Res.* 6:744–758.
56. Saito, T., M. Kimura, ..., Y. Tomita. 1996. Correlation between integrin alpha 5 expression and the malignant phenotype of transitional cell carcinoma. *Br. J. Cancer*. 73:327–331.
57. Rico, F., P. Roca-Cusachs, ..., D. Navajas. 2005. Probing mechanical properties of living cells by atomic force microscopy with blunted pyramidal cantilever tips. *Phys. Rev. E Stat. Nonlin. Soft Matter Phys.* 72:021914.
58. Trichet, L., J. Le Digabel, ..., B. Ladoux. 2012. Evidence of a large-scale mechanosensing mechanism for cellular adaptation to substrate stiffness. *Proc. Natl. Acad. Sci. USA*. 109:6933–6938.
59. Guilluy, C., L. D. Osborne, ..., K. Burridge. 2014. Isolated nuclei adapt to force and reveal a mechanotransduction pathway in the nucleus. *Nat. Cell Biol.* 16:376–381.

**Biophysical Journal, Volume 114**

**Supplemental Information**

**Mechanosensitivity of Cancer Cells in Contact with Soft Substrates Using AFM**

**Yara Abidine, Andrei Constantinescu, Valérie M. Laurent, Vinoth Sundar Rajan, Richard Michel, Valentin Laplaud, Alain Duperray, and Claude Verdier**

## Supporting Material

### Appendix A: Numerical simulations of indentation with a three-layer model

The corrected Hertz formula for the apparent elastic modulus obtained by the indentation of a three-layer substrate proposed in Eq. 2 was assessed using the numerical model for indentation of a multilayered substrate (1). The computations are based on (i) the Papkovitch-Neuber potential description of the displacements field in each layer, (ii) displacement and traction continuity across the interfaces and (iii) a frictionless contact condition using the exact shape of a rigid indenter. However several algorithmic details have been adapted to the precise shape of the AFM indenter, i.e. a rounded cone with a sharp angle of 20 degrees. The sharp angle imposed a novel estimation of the apparent contact modulus based on the geometry of the rounded cone, i.e. combining the spherical shape with a vertically shifted cone, whereas in (2, 1) only the cone was used. Moreover the starting point and the algorithm for the computation of the contact area have also been modified to insure a fast and robust convergence.

A typical example of indentation of a three-layer substrate using the AFM tip with elastic moduli and layer thicknesses of the discussed experiment is displayed in Fig. S1. The picture displays several characteristic features of the indentation of a layered medium and is coherent with experimental observations and theoretical expectations. One can remark that values of the apparent contact modulus at small indentation depth converge to the value of the apparent contact modulus of the first layer. Note that the apparent contact modulus of a material also depends on the Poisson coefficient and is not equal to the Young modulus of the material. This convergence to the apparent contact modulus was obtained after corrections based on the exact shape of the AFM indenter as explained before.

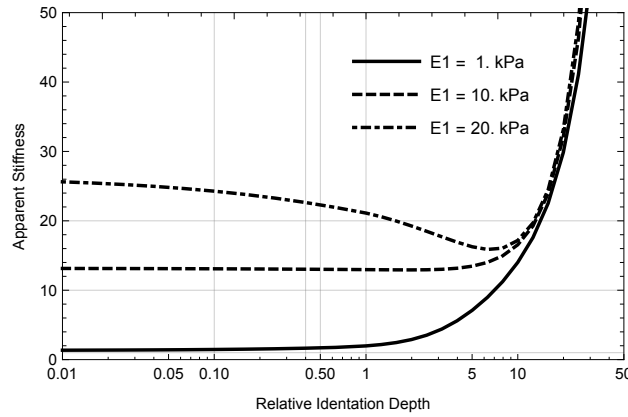

Figure S1: LogNormal plot of the apparent contact modulus  $\bar{E}$  vs. reduced indentation depth  $\delta/h_{12}$  for different moduli of the first layer  $E_1 = 1, 10, 20$  kPa (cell) and a second layer of  $E_2 = 8$  kPa (gel) on a very rigid substrate  $E_3 = 70$  MPa (glass).  $h_1 = 10 \mu\text{m}$  and  $h_2 = 70 \mu\text{m}$ . Note the minimum of the curve when  $E_1 > E_2$ .

Furthermore, the model predicts the apparent contact modulus of the first layer correctly even when the second layer is softer. In addition, the apparent contact modulus presents in this case a minimum located in the second layer zone as expected.

Let us further present the approximation of the correction of the Hertz formula for a three-layer system. One can first consider the apparent contact modulus  $\bar{E}_{12}$  of the double layer (made of layers 1 and 2), which can be decomposed as in (2):

$$\bar{E}_{12(\delta)} = \bar{E}_2 + \frac{\bar{E}_1 - \bar{E}_2}{1 + \left(\frac{\delta}{\beta_0 h_1}\right)^{\eta_0}} \quad (\text{S1})$$

where  $\bar{E}_1 = \frac{E_1}{1-\nu_1^2}$ ,  $\bar{E}_2 = \frac{E_2}{1-\nu_2^2}$  and  $\beta_0, \eta_0$  are adjusting constants. Constructing a similar formula, by adding the substrate (layer 3), leads to the final representation of the apparent modulus  $\bar{E}_{(\delta)}$ :

$$\bar{E}_{(\delta)} = \bar{E}_3 + \frac{\bar{E}_{12} - \bar{E}_3}{1 + \left(\frac{\delta}{\beta_1 h_{12}}\right)^{\eta_1}} \quad (\text{S2})$$

where  $\bar{E}_3 = \frac{E_3}{1-\nu_3^2}$  is the apparent modulus of the substrate,  $h_{12} = h_1 + h_2$  is the combined height of the two layers and  $\beta_1$  and  $\eta_1$  are adjusting parameters. Combining Eq. S1 and Eq. S2, one obtains using simple algebra:

$$\bar{E}_{(\delta)} = \bar{E}_3 + \frac{\bar{E}_2 + \frac{\bar{E}_1 - \bar{E}_2}{1 + \left(\frac{\delta}{\beta_0 h_1}\right)^{\eta_0}} - \bar{E}_3}{1 + \left(\frac{\delta}{\beta_1 h_{12}}\right)^{\eta_1}} \quad (\text{S3})$$

The adjusting parameters, i.e.  $\beta_0, \eta_0, \beta_1$  and  $\eta_1$ , are obtained by fitting the apparent contact modulus in Eq. S3 with the numerical results using a least square method. Two typical adjustments are displayed in Fig. S2 A and B.

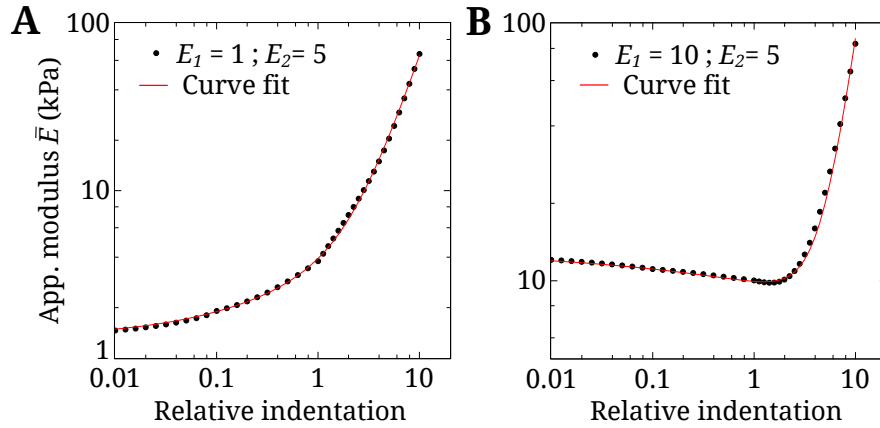

Figure S2: Comparison of the apparent contact modulus  $\bar{E}_{(\delta)}$  obtained from the three-layer model (*points*) and Eq. S3 (*line*). (A)  $E_1 = 1$  kPa,  $E_2 = 5$  kPa (and  $E_3 = 70$  MPa). The fitted parameters for this curve are  $\beta_0 = 3.7$ ,  $\eta_0 = 0.6$ ,  $\beta_1 = 5.9$  and  $\eta_1 = 1.8$ . (B)  $E_1 = 5$  kPa,  $E_2 = 10$  kPa (and  $E_3 = 70$  MPa). The fitted parameters for this curve are  $\beta_0 = 1.55$ ,  $\eta_0 = 0.38$ ,  $\beta_1 = 109$  and  $\eta_1 = 2.88$ .

The four fitting parameters  $\beta_0, \eta_0, \beta_1$  and  $\eta_1$  are obtained and plotted against  $E_1$ . Fits are made, to be used in the iteration procedure, as explained in Appendix B below.

## Appendix B: Linearization of the modified Hertz model of indentation

Once analytical relations for  $\bar{E}(\delta)$  have been found, a linearization can be done. The indentation force  $F_0$  applied to our sample, as a function of the indentation  $\delta_0$ , is:

$$F_0 = \frac{3}{4} \bar{E}_{(\delta_0)} \tan \theta \delta_0^2 \quad (\text{S4})$$

where  $\theta$  is the pyramid half-angle. A small oscillatory amplitude  $\delta$  is superposed to the indentation  $\delta_0$ . Eq. S4 becomes:

$$F_0 + F = \frac{3}{4} \bar{E}_{(\delta_0+\delta)} \tan \theta (\delta_0 + \delta)^2 \quad (\text{S5})$$

Only terms of the first order are kept, therefore:

$$\frac{F}{\delta} = \frac{3}{2} \tan \theta \delta_0 [\bar{E}_{(\delta_0)} + \frac{\delta_0}{2} \bar{E}'_{(\delta_0)}] \quad (\text{S6})$$

Let us now differentiate the apparent modulus  $\bar{E}(\delta)$  with respect to the indentation  $\delta$ , from Eq. S3:

$$\begin{aligned} \bar{E}'_{(\delta)} = \frac{d\bar{E}}{d\delta} &= \frac{1}{[1 + (\frac{\delta}{\beta_1 h_{12}})^{\eta_1}]^2} \times \\ &\frac{1}{\delta} \left[ (\bar{E}_2 - \bar{E}_1) \eta_0 \left(\frac{\delta}{\beta_0 h_1}\right)^{\eta_0} \frac{1 + (\frac{\delta}{\beta_1 h_{12}})^{\eta_1}}{(1 + (\frac{\delta}{\beta_0 h_1})^{\eta_0})^2} + \eta_1 \left(\frac{\delta}{\beta_1 h_{12}}\right)^{\eta_1} (\bar{E}_3 - \bar{E}_2 - \frac{\bar{E}_1 - \bar{E}_2}{1 + (\frac{\delta}{\beta_0 h_1})^{\eta_0}}) \right] \end{aligned} \quad (\text{S7})$$

Introducing the following variables  $\chi_0 = \frac{\delta_0}{\beta_0 h_1}$  and  $\chi_1 = \frac{\delta_0}{\beta_1 h_{12}}$ , the apparent modulus in Eq. S3 is evaluated at  $\delta_0$ :

$$\bar{E}_{(\delta_0)} = \frac{\bar{E}_1 + \bar{E}_2 \chi_0^{\eta_0} + \bar{E}_3 (1 + \chi_0^{\eta_0}) \chi_1^{\eta_1}}{(1 + \chi_0^{\eta_0})(1 + \chi_1^{\eta_1})} \quad (\text{S8})$$

and  $\bar{E}'_{(\delta)}$  from Eq. S7 is evaluated at  $\delta = \delta_0$ :

$$\begin{aligned} \bar{E}'_{(\delta_0)} = \frac{d\bar{E}}{d\delta}_{(\delta_0)} &= \frac{1}{[1 + \chi_1^{\eta_1}]^2} \frac{1}{\delta_0} \times \\ &(-\bar{E}_1 \left[ \eta_0 \chi_0^{\eta_0} \frac{1 + \chi_1^{\eta_1}}{(1 + \chi_0^{\eta_0})^2} + \eta_1 \chi_1^{\eta_1} \frac{1}{1 + \chi_0^{\eta_0}} \right] + \bar{E}_2 \left[ \eta_0 \chi_0^{\eta_0} \frac{1 + \chi_1^{\eta_1}}{(1 + \chi_0^{\eta_0})^2} - \eta_1 \chi_1^{\eta_1} \frac{\chi_0^{\eta_0}}{1 + \chi_0^{\eta_0}} \right] + \bar{E}_3 [\eta_1 \chi_1^{\eta_1}]) \end{aligned} \quad (\text{S9})$$

Now let us replace the apparent modulus  $\bar{E}(\delta_0)$  and  $\bar{E}'_{(\delta_0)}$  from Eq. S8–S9 into Eq. S6. We obtain:

$$\frac{F}{\delta} \frac{2}{3 \tan \theta \delta_0} = \bar{E}_1 k_1(\chi_0, \chi_1) + \bar{E}_2 k_2(\chi_0, \chi_1) + \bar{E}_3 k_3(\chi_1) \quad (\text{S10})$$

where we have defined:

$$\begin{cases} k_1(\chi_0, \chi_1) = \frac{2(1 + \chi_0^{\eta_0})(1 + \chi_1^{\eta_1}) - \eta_0 \chi_0^{\eta_0}(1 + \chi_1^{\eta_1}) + \eta_1 \chi_1^{\eta_1}(1 + \chi_0^{\eta_0})}{2(1 + \chi_0^{\eta_0})^2(1 + \chi_1^{\eta_1})^2} \\ k_2(\chi_0, \chi_1) = \frac{2\chi_0^{\eta_0}(1 + \chi_0^{\eta_0})(1 + \chi_1^{\eta_1}) + \eta_0 \chi_0^{\eta_0}(1 + \chi_1^{\eta_1}) - \eta_1 \chi_1^{\eta_1} \chi_0^{\eta_0}(1 + \chi_0^{\eta_0})}{2(1 + \chi_0^{\eta_0})^2(1 + \chi_1^{\eta_1})^2} \\ k_3(\chi_1) = \frac{\chi_1^{\eta_1}(2 + \eta_1 + 2\chi_1^{\eta_1})}{2(1 + \chi_1^{\eta_1})^2} \end{cases} \quad (\text{S11})$$

It is now possible to obtain the apparent moduli  $\bar{E}_1$  from Eq. S10:

$$\bar{E}_1 = \frac{F}{\delta} \frac{2}{3 k_1 \tan \theta \delta_0} - \bar{E}_2 \frac{k_2}{k_1} - \bar{E}_3 \frac{k_3}{k_1} \quad (\text{S12})$$

Using  $E_1 = 2 G_1 (1 + \nu_1)$ , and the expressions of  $\bar{E}_1$ ,  $\bar{E}_2$  and  $\bar{E}_3$ , Eq. S12 can be rewritten:

$$G_1 = \frac{F}{\delta} \frac{1 - \nu_1}{3 \tan \theta \delta_0} \frac{1}{k_1} - E_2 \frac{k_2}{k_1} \frac{1 - \nu_1}{2(1 - \nu_2^2)} - E_3 \frac{k_3}{k_1} \frac{1 - \nu_1}{2(1 - \nu_3^2)} \quad (\text{S13})$$

Let us introduce the complex force  $F^*(\omega)$  and indentation  $\delta^*(\omega)$ ; the complex shear modulus  $G^*(\omega)$  of the first layer is:

$$G^*(\omega) = G_1^*(\omega) = \frac{F^*(\omega)}{\delta^*(\omega)} \frac{1 - \nu_1}{3 \tan \theta \delta_0} \frac{1}{k_1} - E_2^* \frac{k_2}{k_1} \frac{1 - \nu_1}{2(1 - \nu_2^2)} - E_3^* \frac{k_3}{k_1} \frac{1 - \nu_1}{2(1 - \nu_3^2)} \quad (\text{S14})$$

where  $E_2^*$  and  $E_3^*$  can also be complex. When using elastic gels, we use  $E_2^* = E_2$  which is real. When using endothelial cells,  $E_2^*$  is complex and was measured separately. Finally  $E_3^* = E_3$  is real for the glass substrate. Eq. S14 is used to determine  $G^*(\omega)$  based on an iterative process. This requires to initiate with a given value of  $G_1^*$  (close to previous ones), determine  $k_1$ , and plug it into the right hand side of Eq. S14 to find the new  $G^* = G_1^*$ . A few iterations (around twenty usually) are necessary to converge to the desired value  $G^*(\omega)$ .

## Appendix C: Influence of substrate rheology and thickness

Simulations were carried out to characterize the influence of the substrate rheology and height in the three-layer model described in our study. Here we considered an apparent shear complex modulus  $G_1^*(\omega)$  for the first layer ( $G_1^* = G_{cell}^*$ ), and calculated the corrected modulus  $G_{cor}^*(\omega)$  depending on different parameters of the substrate.

As an example,  $G_1^*(\omega)$  is generated using the simplified fitting model described in Eqs. 6–7, with the following values of the parameters:  $G_N^0 = 2000$  Pa,  $n_f = 0.1$ ,  $k_0 = 200$  Pa,  $g_1 = 5$ ,  $a = 1.2$ ,  $b = 1.5$ , consistent with classical cell data. Thus, the value of the modulus  $|G_1^*|^1$  at low frequencies is  $|G_1^*(1Hz)| \sim 2$  kPa and  $E_1 \sim 3 |G_1^*(1Hz)| \sim 6$  kPa.

The three different gels used in our study ( $E_2 = 5, 8, 28$  kPa) were considered. Then an elastic substrate as well as a viscoelastic substrate were simulated. Finally, the sensibility to the height of the substrate was studied using three different

<sup>1</sup>The modulus of the complex shear modulus  $G^*$  is  $|G^*| = (G'^2 + G''^2)^{1/2}$



values  $h_2 = 2, 8, 70 \mu\text{m}$ . In all these cases, the height  $h_1 = 1 \mu\text{m}$  of the first layer (the cell) and the indentation  $\delta = 400 \text{ nm}$  of the tip were kept constant.

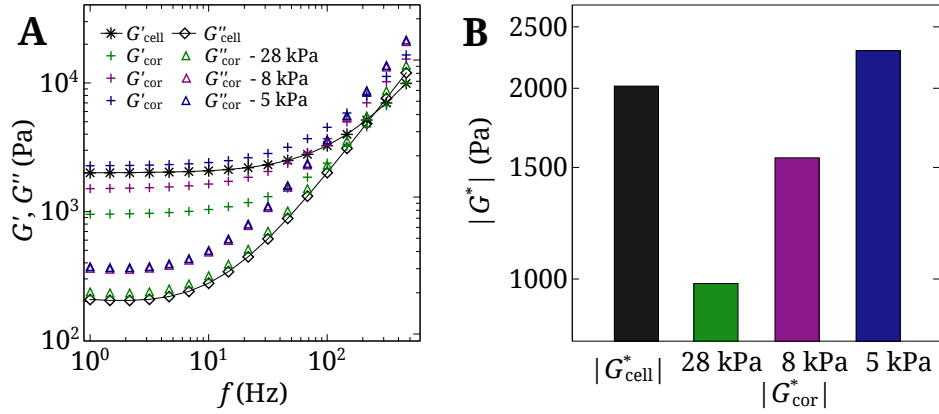

Figure S3: Substrate correction when the substrate has an elastic modulus  $E_2$  higher, close to or smaller than the elastic modulus  $E_1 = 6 \text{ kPa}$  of the first layer (cell). (A) Generated viscoelastic moduli of the cell  $G_1^* = G_{cell}^*$  (black), and corrected viscoelastic moduli considering three values of  $E_2 = 5, 8, 28 \text{ kPa}$ . (B)  $|G_{cell}^*|$  and the corresponding values of  $|G_{cor}^*|$  calculated at  $1 \text{ Hz}$ . In this simulation,  $h_2 = 70 \mu\text{m}$ ,  $h_1 = 1 \mu\text{m}$ , and  $\delta = 400 \text{ nm}$ .

### Influence of the substrate elasticity

Fig. S3 shows the influence of the second layer elastic modulus  $E_2$  on the viscoelastic properties of the first layer ( $G_1^* = G_{cell}^*$ ). The results can be summarized as follows, using  $E_{cell} = 3 |G_{cell}^*|$ :

- If  $E_{cell} > E_2$ , the cell rigidity is underestimated because of the presence of a softer substrate below. Thus the correction increases the values of  $G'$  and  $G''$  (Fig. S3 A, blue symbols).

- If  $E_{cell} < E_2$ , the cell rigidity is overestimated because of the presence of a more rigid substrate below, and the correction lowers the values of  $G'$  (Fig. S3 A, purple and green symbols). On the other hand, the effect on  $G''$  depends non linearly on  $E_2$ .

The higher  $E_2$ , the higher the correction (see larger correction of  $E_2 = 28 \text{ kPa}$  as compared to  $E_2 = 5$  and  $8 \text{ kPa}$ ). These results are summarized in Fig. S3 B where the shear modulus  $|G_{cor}^*|$  at  $1 \text{ Hz}$  is represented in the three cases.

### Comparison between an elastic substrate and a viscoelastic substrate

When we considered a viscoelastic substrate with high values of  $G''$  (like the layer of HUVECs, Fig. S4 A), the cell viscous component was affected as follows:

- If  $G''_{cell} > G''_{substrate}$ , the cell viscous component is underestimated, and the correction increases  $G''_{cell}$ .
- If  $G''_{cell} < G''_{substrate}$ , the cell viscous component is overestimated, and the correction decreases  $G''_{cell}$  as shown in Fig. S4 B (turquoise).

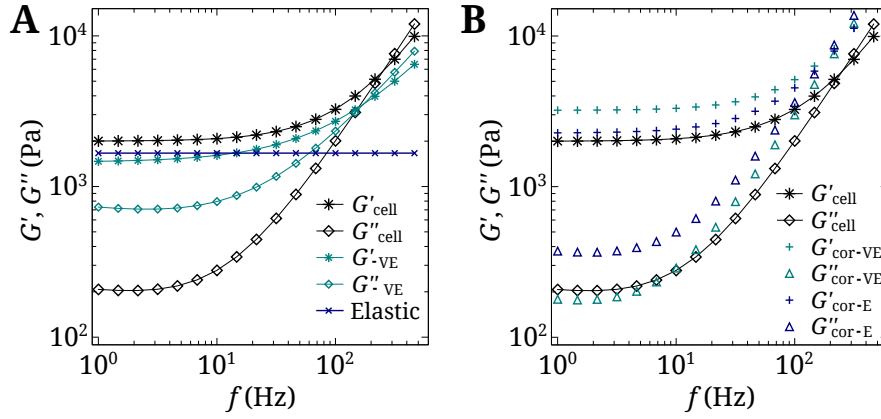

Figure S4: Correction of the apparent modulus  $G_{cell}^*$  considering an elastic substrate and a viscoelastic one. (A) Apparent viscoelastic moduli of the cell  $G_{cell}^*$  (black), of the substrate  $G_{VE}^*$  (turquoise) with  $|G_2^*(1Hz)| = 1.7$  kPa, and corresponding elastic substrate  $E_2 = 5$  kPa  $\sim 3|G_2^*(1Hz)|$  kPa (blue). The viscoelastic moduli of the substrate were generated using the fitting model. (B) Corrected viscoelastic moduli considering the viscoelastic substrate (turquoise) and the elastic substrate (blue).

Considering only an equivalent elastic substrate (same  $|G_2^*(1Hz)| = 1.7$  kPa,  $E_2 \sim 5$  kPa) gave rise to different  $G'$  and  $G''$  (blue). Therefore the precise contribution of the viscoelasticity of the substrate is important as it affects both  $G'$  and  $G''$ .

### Influence of substrate height – Justification of the HUVEC thin layer model

Fig. S5 shows the effect of substrate height  $h_2$  when cells are in contact with an 8 kPa thin layer. In this case, the high value of  $E_2$  leads to overestimation of the moduli  $G'$  and  $G''$ , so a diminution of  $h_2$  increases substrate effects, lowering  $G'$  and  $G''$ . But the correction is very small.

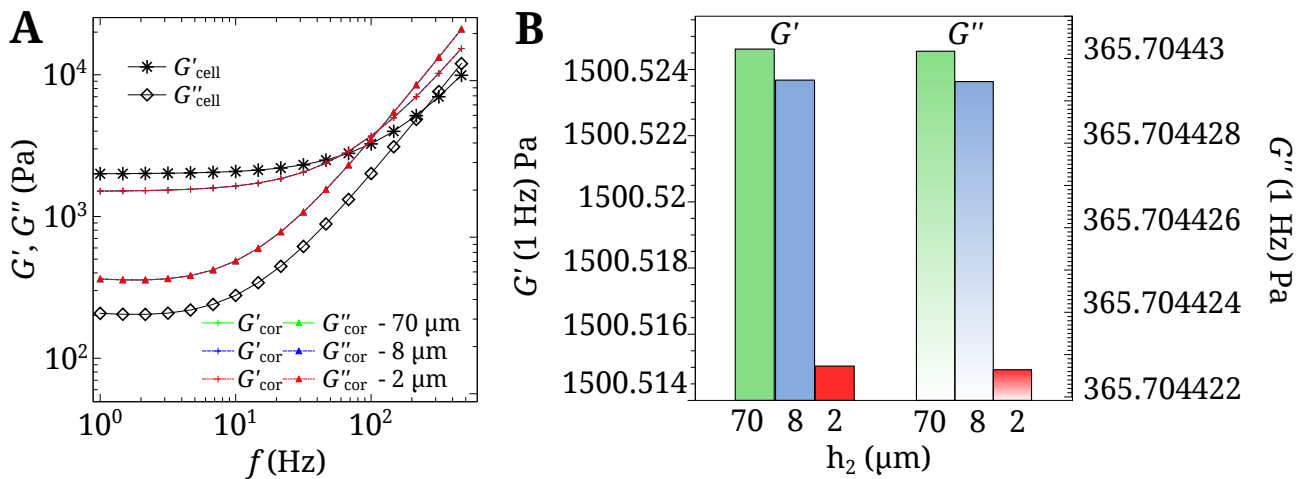

Figure S5: Correction of the apparent modulus  $G_{cell}^*$  considering three different substrate heights  $h_2 = 2, 8, 70 \mu m$ . The other parameters are:  $E_2 = 8$  kPa,  $h_1 = 1 \mu m$  and  $\delta = 0.4 \mu m$ .

This is due to the fact that the relative indentation depth  $\frac{\delta}{h_{12}}$  is always very small in this case. Indeed, as shown in [Fig. S1](#), the apparent stiffness remains almost constant for small relative indentation depths (lower than 0.1), which is the case in most experiments involving the HUVEC monolayer simulated here. The correction mainly comes here from the elasticity  $E_2$  of the underlying substrate ( $E_2 = 8$  kPa), as already seen in [Fig. S3 B](#), but the thickness is not so important. This is a justification of our approach of the endothelial layer, which can be mimicked by a thin layer, even though it has a waviness corresponding to hollows and bumps (thickness between 2 and 8  $\mu\text{m}$ ). Therefore we can assume that the substrate height does not influence much the corrected values of the viscoelastic moduli.

## Appendix D: Cancer cell transmigration through the endothelium

[Movie S1](#) provides adequate evidence of the cancer cell passage through the endothelium.

**Transmigration of cancer cell.** A J82 cancer cell is tagged with Actin–GFP (green) and endothelial cells (purple) are stained using CellTrace Far Red DDAO-SE from Life technologies. Beads also appear in red and indicate the gel (8 kPa) upper surface. At the beginning of transmigration, the endothelial cells are seen from below showing no trace of tumor cell. Then a view from the side shows the dynamic process followed by the cancer cell, penetrating through the endothelial monolayer. At the end, a view from below shows the cancer cell (green) after eventually passing through the endothelium.

## Supporting references

1. Constantinescu, A., A. Korsunsky, O. Pison, and A. Oueslati, 2013. Symbolic and numerical solution of the axisymmetric indentation problem for a multilayered elastic coating. *Int. J. Solids Struct.* 50:2798–2807.
2. Korsunsky, A. M., and A. Constantinescu, 2009. The influence of indenter bluntness on the apparent contact stiffness of thin coatings. *Thin Solid Films* 517:4835–4844.
